# Supplementary material for: Parameter estimation in tree graph metabolic networks
Source: PeerJ. 2016 Sep 20;4:e2417. doi: 10.7717/peerj.2417 (PMC5036115; doi:10.7717/peerj.2417)
Supplement: Supplemental Information 1 — This excel file contains the concentrations of the metabolites on different time points and under different conditions. [file peerj-04-2417-s001.xlsx]

## Sheet: enzymes
q -> q-3-g	CONTROL					DARK					24HCL
	5	6	7	8	9	5	6	7	8	9	5	6	7	8	9
mol of Q.hr-1.KgDW-1	0.140519	0.105599	0.0685425	0.0613848	0.0403051	0.140519	0.146852	0.095031	0.080523	0.0537355	0.140519	0.200266	0.088465	0.0751152	0.1221
mol of Q.hr-1.KgDW-1	0.174336	0.137907	0.0664457	0.0431879	0.0441528	0.174336	0.136288	0.088642	0.0791411	0.0428235	0.174336	0.167475	0.103725	0.0687515	0.0610499
	CONTROL					DARK					24HCL
q-3-g -> q-3gr	5	6	7	8	9	5	6	7	8	9	5	6	7	8	9
mol of Q.hr-1.KgDW-1	0.102644	0.0859062	0.0502283	0.0553593	0.0346312	0.102644	0.094086	0.0659096	0.07223	0.0581769	0.102644	0.106666	0.0666688	0.0605726	0.0313684
mol of Q.hr-1.KgDW-1	0.15319	0.0906208	0.0668186	0.0472883	0.0561996	0.15319	0.1281	0.101583	0.0878188	0.0683874	0.15319	0.152573	0.0868391	0.060027	0.0624662

## Sheet: calculation metabolites
				watercontent	16.0567	16.0567	16.0567	20.4741	20.4741	20.4741	30.7328	30.7328	30.7328	37.1457	37.1457	37.1457	39.3403	39.3403	39.3403	16.0567	16.0567	16.0567	19.2287	19.2287	19.2287	29.6936	29.6936	29.6936	36.2649	36.2649	36.2649	38.5603	38.5603	38.5603	16.0567	16.0567	16.0567	22.0473	22.0473	32.2172	32.2172	32.2172	38.5963	38.5963	38.5963	40.8403	40.8403	40.8403
				materialcontent	83.9433	83.9433	83.9433	79.5259	79.5259	79.5259	69.2672	69.2672	69.2672	62.8543	62.8543	62.8543	60.6597	60.6597	60.6597	83.9433	83.9433	83.9433	80.7713	80.7713	80.7713	70.3064	70.3064	70.3064	63.7351	63.7351	63.7351	61.4397	61.4397	61.4397	83.9433	83.9433	83.9433	77.9527	77.9527	67.7828	67.7828	67.7828	61.4037	61.4037	61.4037	59.1597	59.1597	59.1597
					133	135	134	142	144	143	151	153	152	162	160	161	222	220	221	133	135	134	207	203	202	212	208	210	216	215	214	171	170	169	133	135	134	178	185	184	180	186	191	190	192	196	197	198
					133-vic37-cot-5d-a	135-vic37-cot-5d-c	134-vic37-cot-5d-b	142-vic37-cot-6d-a	144-vic37-cot-6d-c	143-vic37-cot-6d-b	151-vic37-cot-7d-a	153-vic37-cot-7d-c	152-vic37-cot-7d-b	162-vic37-cot-8d-c	160-vic37-cot-8d-a	161-vic37-cot-8d-b	222-vic37-cot-9d-c	220-vic37-cot-9d-a	221-vic37-cot-9d-b	133-vic37-cot-5d-a	135-vic37-cot-5d-c	134-vic37-cot-5d-b	207-vic37-24hl-cot-6d-c	203-vic37-24hl-cot-6d-b	202-vic37-24hl-cot-6d-a	212-vic37-24hl-cot-7d-b	208-vic37-24hl-cot-7d-a	210-vic37-24hl-cot-7d-c	216-vic37-24hl-cot-8d-c	215-vic37-24hl-cot-8d-b	214-vic37-24hl-cot-8d-a	171-vic37-24hl-cot-9d-c	170-vic37-24hl-cot-9d-b	169-vic37-24hl-cot-9d-a	133-vic37-cot-5d-a	135-vic37-cot-5d-c	134-vic37-cot-5d-b	178-vic37-dark-cot-6d-a	185-vic37-dark-cot-6d-b	184-vic37-dark-cot-7d-a	180-vic37-dark-cot-7d-c	186-vic37-dark-cot-7d-c	191-vic37-dark-cot-8d-b	190-vic37-dark-cot-8d-a	192-vic37-dark-cot-8d-c	196-vic37-dark-cot-9d-a	197-vic37-dark-cot-9d-b	198-vic37-dark-cot-9d-c
					cot	cot	cot	cot	cot	cot	cot	cot	cot	cot	cot	cot	cot	cot	cot	cot	cot	cot	cot	cot	cot	cot	cot	cot	cot	cot	cot	cot	cot	cot	cot	cot	cot	cot	cot	cot	cot	cot	cot	cot	cot	cot	cot	cot
					control	control	control	control	control	control	control	control	control	control	control	control	control	control	control	control	control	control	24hl	24hl	24hl	24hl	24hl	24hl	24hl	24hl	24hl	24hl	24hl	24hl	control	control	control	dark	dark	dark	dark	dark	dark	dark	dark	dark	dark	dark
					d5	d5	d5	d6	d6	d6	d7	d7	d7	d8	d8	d8	d9	d9	d9	d5	d5	d5	d6	d6	d6	d7	d7	d7	d8	d8	d8	d9	d9	d9	d5	d5	d5	d6	d6	d7	d7	d7	d8	d8	d8	d9	d9	d9
centrotype		rt	mass		M24536	M24582	M24689	M24608	M24614	M24637	M24490	M24606	M24618	M24492	M24647	M24654	M24535	M24602	M24686	M24536	M24582	M24689	M24515	M24641	M24678	M24476	M24544	M24631	M24475	M24601	M24656	M24586	M24593	M24663	M24536	M24582	M24689	M24624	M24666	M24498	M24543	M24652	M24480	M24488	M24653	M24486	M24502	M24638
3593	wag34-n419 quercetin 3-o-glucoside	25.2764	463.088	ntensity	2339	2125	1848	3124	2315	2889	2200	2088	2193	1798	1689	1519	1867	1504	1980	2339	2125	1848	2997	2919	2516	2909	3991	3301	2797	2796	4390	2558	1875	2131	2339	2125	1848	2825	2818	2857	3822	2849	2861	2534	2704	2461	2282	1621
				umol/Kg DW	13.2334	12.0226	10.4554	17.6747	13.0976	16.3451	12.447	11.8133	12.4074	10.1726	9.55587	8.59406	10.5629	8.50919	11.2023	13.2334	12.0226	10.4554	16.9562	16.5149	14.2348	16.4583	22.5799	18.6761	15.8246	15.819	24.8373	14.4724	10.6082	12.0566	13.2334	12.0226	10.4554	15.983	15.9434	16.1641	21.6238	16.1188	16.1867	14.3366	15.2984	13.9236	12.9109	9.17115
3399	WAG89-N362 Quercetin 3-O-rutinoside	24.2846	609.146	ntensity	7139	8428	6120	18324	13190	15486	17543	16911	19135	14986	14968	13349	17951	13077	17801	7139	8428	6120	14203	18470	13452	20016	23023	21480	21615	21646	26012	24131	21331	21303	7139	8428	6120	13182	16074	16271	16087	17835	16009	14795	19181	14818	13964	11258
				umol/Kg DW	25.2181	29.7715	21.6186	64.7285	46.593	54.7035	61.9697	59.7372	67.5933	52.9372	52.8736	47.1546	63.4109	46.1938	62.8811	25.2181	29.7715	21.6186	50.1713	65.2443	47.5185	70.7054	81.3275	75.8769	76.3538	76.4633	91.886	85.2414	75.3506	75.2517	25.2181	29.7715	21.6186	46.5647	56.7805	57.4764	56.8265	63.0012	56.5509	52.2625	67.7558	52.3438	49.3271	39.7683
2837	WAG40 Que-hex-hex (3-O)	20.8195	625.141	ntensity	11671	6337	6195	7067	6230	6719	6877	5623	6054	5481	6560	5795	5956	3410	4434	11671	6337	6195	5973	9943	4897	4279	6535	5646	4234	5158	7379	7554	3494	4847	11671	6337	6195	7360	7601	8953	10047	8352	11271	7876	9699	13419	11865	11700
				umol/Kg DW	39.9009	21.665	21.1795	24.1607	21.2991	22.9709	23.5111	19.2239	20.6974	18.7385	22.4274	19.812	20.3624	11.6581	15.159	39.9009	21.665	21.1795	20.4205	33.9932	16.7419	14.6291	22.3419	19.3026	14.4752	17.6342	25.2274	25.8256	11.9453	16.5709	39.9009	21.665	21.1795	25.1624	25.9863	30.6085	34.3487	28.5538	38.5333	26.9265	33.159	45.8769	40.5641	40
2994	wag95-n284 quercetin-hexose-deoxyhexose, -pentose	22.2813	741.19	ntensity	235	236	170	323	221	283	329	280	337	282	257	277	368	269	383	235	236	170	316	398	255	350	449	365	444	361	749	669	438	504	235	236	170	267	265	294	336	316	310	267	335	278	281	214
				umol/Kg DW	1.40803	1.41402	1.01857	1.93529	1.32415	1.69563	1.97124	1.67765	2.01917	1.68963	1.53984	1.65968	2.20491	1.61174	2.29479	1.40803	1.41402	1.01857	1.89335	2.38466	1.52786	2.09706	2.69023	2.18694	2.66028	2.16297	4.48772	4.00839	2.62433	3.01977	1.40803	1.41402	1.01857	1.59976	1.58778	1.76153	2.01318	1.89335	1.8574	1.59976	2.00719	1.66567	1.68364	1.2822
2210	wag60-n171 quercetin 3-o-rutinoside-7-o-glucoside	15.4404	771.2	ntensity	210	184	140	287	247	264	275	253	261	261	270	310	366	317	380	210	184	140	307	335	263	274	387	329	294	372	700	530	372	515	210	184	140	214	239	278	315	316	220	208	280	248	246	217
				umol/Kg DW	0.756975	0.663254	0.50465	1.03453	0.890347	0.951626	0.991277	0.911975	0.940812	0.940812	0.973254	1.11744	1.3193	1.14267	1.36976	0.756975	0.663254	0.50465	1.10663	1.20756	0.948021	0.987672	1.395	1.18593	1.05976	1.34093	2.52325	1.91046	1.34093	1.85639	0.756975	0.663254	0.50465	0.771394	0.86151	1.00209	1.13546	1.13907	0.793021	0.749766	1.0093	0.893951	0.886742	0.782207
1796	WAG135 Quercetin - Hex-Hex-Hex	11.7948	787.196	ntensity	705	404	440	692	617	599	566	652	607	593	670	758	757	609	702	705	404	440	581	1082	647	398	794	715	432	700	1032	1149	494	794	705	404	440	638	644	653	801	804	726	497	840	621	579	746
				umol/Kg DW	5.13699	2.94375	3.20606	5.04226	4.49577	4.36462	4.12416	4.7508	4.42291	4.3209	4.88196	5.52317	5.51588	4.43748	5.11513	5.13699	2.94375	3.20606	4.23346	7.884	4.71437	2.90003	5.78549	5.20985	3.14777	5.10055	7.51967	8.37219	3.59953	5.78549	5.13699	2.94375	3.20606	4.64879	4.69251	4.75809	5.83649	5.85835	5.29	3.62139	6.12066	4.52492	4.21889	5.43573
3231	WAG123 Isorhamnetin - Hexose ,- Hexose (3,7-O) ?	23.5626	639.157	ntensity	1407	903	852	1098	929	955	1060	841	952	729	968	710	606	444	561	1407	903	852	702	1038	659	612	801	660	486	594	849	667	534	481	1407	903	852	1026	1033	1067	1310	1192	1316	1164	1372	1559	1576	1573
				umol/Kg DW	2.74805	1.76367	1.66406	2.14453	1.81445	1.86523	2.07031	1.64258	1.85938	1.42383	1.89062	1.38672	1.18359	0.867188	1.0957	2.74805	1.76367	1.66406	1.37109	2.02734	1.28711	1.19531	1.56445	1.28906	0.949219	1.16016	1.6582	1.30273	1.04297	0.939453	2.74805	1.76367	1.66406	2.00391	2.01758	2.08398	2.55859	2.32812	2.57031	2.27344	2.67969	3.04492	3.07812	3.07227
3460	N449 Isorhamnetin - Hexose - Hexose (3-O) ?	24.5008	639.157	ntensity	531	354	298	417	329	350	373	358	341	334	361	317	310	213	243	531	354	298	351	484	279	247	361	305	281	294	359	393	209	244	531	354	298	417	393	469	493	420	618	440	532	668	600	539
				umol/Kg DW	1.03711	0.691406	0.582031	0.814453	0.642578	0.683594	0.728516	0.699219	0.666016	0.652344	0.705078	0.619141	0.605469	0.416016	0.474609	1.03711	0.691406	0.582031	0.685547	0.945312	0.544922	0.482422	0.705078	0.595703	0.548828	0.574219	0.701172	0.767578	0.408203	0.476562	1.03711	0.691406	0.582031	0.814453	0.767578	0.916016	0.962891	0.820312	1.20703	0.859375	1.03906	1.30469	1.17188	1.05273
4021	wag33-n555 kaempferol-3-o-glucoside	28.4181	447.094	ntensity	1643	1549	1246	1640	1070	1479	851	680	881	532	584	494	494	491	690	1643	1549	1246	1536	1607	1402	1394	1760	1527	1032	1049	1731	700	483	564	1643	1549	1246	1430	1123	1093	1804	1210	862	749	923	643	630	547
				umol/Kg DW	23.8427	22.4786	18.0816	23.7992	15.5275	21.4628	12.3494	9.86794	12.7848	7.72021	8.47482	7.16877	7.16877	7.12524	10.0131	23.8427	22.4786	18.0816	22.2899	23.3203	20.3454	20.2293	25.5406	22.1593	14.9761	15.2228	25.1197	10.1582	7.00914	8.18459	23.8427	22.4786	18.0816	20.7517	16.2966	15.8613	26.1791	17.5591	12.5091	10.8692	13.3943	9.33101	9.14236	7.93789
3152	WAG54 Kaempferol-Hexose-Hexose (3-O) ?	23.039	609.146	ntensity	5046	3553	3386	3939	3509	3900	3264	3059	3536	2835	3394	2770	2744	1774	2175	5046	3553	3386	3083	4419	2549	2207	2992	2598	2127	2588	3352	3072	1989	1985	5046	3553	3386	3934	4086	3998	5422	4394	4939	4606	5206	5309	5736	6310
				umol/Kg DW	40.0286	28.185	26.8602	31.247	27.836	30.9376	25.8924	24.2662	28.0501	22.4893	26.9237	21.9737	21.7674	14.0727	17.2537	40.0286	28.185	26.8602	24.4566	35.0547	20.2205	17.5075	23.7347	20.6092	16.8729	20.5299	26.5905	24.3693	15.7782	15.7465	40.0286	28.185	26.8602	31.2074	32.4131	31.7151	43.0113	34.8564	39.1798	36.5382	41.2978	42.1149	45.5021	50.0555
3885	wag83-n442 kaempferol 3-o-rutinoside	27.3173	593.15	ntensity	4941	5276	4018	9680	6449	7938	8673	6710	9130	6206	6175	5618	7361	4675	7657	4941	5276	4018	8422	9130	7073	11073	13023	11634	9205	11098	18216	12342	7705	9319	4941	5276	4018	7542	7796	8881	8981	9097	8348	6734	9143	7361	7176	4956
				umol/Kg DW	15.6173	16.6761	12.6999	30.5961	20.3837	25.0901	27.4132	21.2087	28.8577	19.6157	19.5177	17.7571	23.2663	14.7765	24.2019	15.6173	16.6761	12.6999	26.6199	28.8577	22.356	34.9991	41.1625	36.7722	29.0948	35.0781	57.5763	39.0101	24.3536	29.4551	15.6173	16.6761	12.6999	23.8384	24.6413	28.0707	28.3868	28.7534	26.386	21.2845	28.8988	23.2663	22.6816	15.6647
2481	WAG101-N214 Kaempferol 3-O-rutinoside-7-O-glucoside	17.7332	755.206	ntensity	124	103		229	170	195	223	183	219	189	175	170	232	195	219	124	103		214	210	170	270	280	249	249	288	523	401	271	394	124	103		169	201	244	215	259	169	160	236	138	169	110
				umol/Kg DW	0.539952	0.448509	0	0.99717	0.740257	0.849118	0.971043	0.796865	0.953625	0.822992	0.762029	0.740257	1.01023	0.849118	0.953625	0.539952	0.448509	0	0.931853	0.914435	0.740257	1.1757	1.21925	1.08426	1.08426	1.25408	2.27738	1.74614	1.18006	1.71565	0.539952	0.448509	0	0.735902	0.875245	1.06249	0.936207	1.1278	0.735902	0.696712	1.02765	0.600914	0.735902	0.47899
1934	WAG102 Kaempferol - Hex-Hex-Hex	13.1296	771.201	ntensity	511	323	362	532	480	518	481	485	494	487	498	521	539	424	512	511	323	362	480	648	437	292	530	495	301	443	665	616	391	483	511	323	362	480	508	512	717	616	481	459	606	425	492	599
				umol/Kg DW	4.06103	2.56696	2.8769	4.22793	3.81467	4.11667	3.82262	3.85441	3.92593	3.8703	3.95772	4.14051	4.28356	3.36963	4.06898	4.06103	2.56696	2.8769	3.81467	5.14981	3.47294	2.32059	4.21203	3.93388	2.39212	3.52062	5.28491	4.89549	3.10737	3.83851	4.06103	2.56696	2.8769	3.81467	4.03719	4.06898	5.69816	4.89549	3.82262	3.64778	4.81602	3.37757	3.91004	4.76039

## Sheet: metabolites
	control	control	control	control	control	control	control	control	control	control	control	control	control	control	control	control	control	control	24hl	24hl	24hl	24hl	24hl	24hl	24hl	24hl	24hl	24hl	24hl	24hl	control	control	control	dark	dark	dark	dark	dark	dark	dark	dark	dark	dark	dark
	5	5	5	6	6	6	7	7	7	8	8	8	9	9	9	d5	d5	d5	d6	d6	d6	d7	d7	d7	d8	d8	d8	d9	d9	d9	d5	d5	d5	d6	d6	d7	d7	d7	d8	d8	d8	d9	d9	d9
wag34-n419 quercetin 3-o-glucoside	13.2334	12.0226	10.4554	17.6747	13.0976	16.3451	12.447	11.8133	12.4074	10.1726	9.55587	8.59406	10.5629	8.50919	11.2023	13.2334	12.0226	10.4554	16.9562	16.5149	14.2348	16.4583	22.5799	18.6761	15.8246	15.819	24.8373	14.4724	10.6082	12.0566	13.2334	12.0226	10.4554	15.983	15.9434	16.1641	21.6238	16.1188	16.1867	14.3366	15.2984	13.9236	12.9109	9.17115
WAG89-N362 Quercetin 3-O-rutinoside	25.2181	29.7715	21.6186	64.7285	46.593	54.7035	61.9697	59.7372	67.5933	52.9372	52.8736	47.1546	63.4109	46.1938	62.8811	25.2181	29.7715	21.6186	50.1713	65.2443	47.5185	70.7054	81.3275	75.8769	76.3538	76.4633	91.886	85.2414	75.3506	75.2517	25.2181	29.7715	21.6186	46.5647	56.7805	57.4764	56.8265	63.0012	56.5509	52.2625	67.7558	52.3438	49.3271	39.7683
WAG40 Que-hex-hex (3-O)	39.9009	21.665	21.1795	24.1607	21.2991	22.9709	23.5111	19.2239	20.6974	18.7385	22.4274	19.812	20.3624	11.6581	15.159	39.9009	21.665	21.1795	20.4205	33.9932	16.7419	14.6291	22.3419	19.3026	14.4752	17.6342	25.2274	25.8256	11.9453	16.5709	39.9009	21.665	21.1795	25.1624	25.9863	30.6085	34.3487	28.5538	38.5333	26.9265	33.159	45.8769	40.5641	40
wag95-n284 quercetin-hexose-deoxyhexose, -pentose	1.40803	1.41402	1.01857	1.93529	1.32415	1.69563	1.97124	1.67765	2.01917	1.68963	1.53984	1.65968	2.20491	1.61174	2.29479	1.40803	1.41402	1.01857	1.89335	2.38466	1.52786	2.09706	2.69023	2.18694	2.66028	2.16297	4.48772	4.00839	2.62433	3.01977	1.40803	1.41402	1.01857	1.59976	1.58778	1.76153	2.01318	1.89335	1.8574	1.59976	2.00719	1.66567	1.68364	1.2822
wag60-n171 quercetin 3-o-rutinoside-7-o-glucoside	0.756975	0.663254	0.50465	1.03453	0.890347	0.951626	0.991277	0.911975	0.940812	0.940812	0.973254	1.11744	1.3193	1.14267	1.36976	0.756975	0.663254	0.50465	1.10663	1.20756	0.948021	0.987672	1.395	1.18593	1.05976	1.34093	2.52325	1.91046	1.34093	1.85639	0.756975	0.663254	0.50465	0.771394	0.86151	1.00209	1.13546	1.13907	0.793021	0.749766	1.0093	0.893951	0.886742	0.782207
WAG135 Quercetin - Hex-Hex-Hex	5.13699	2.94375	3.20606	5.04226	4.49577	4.36462	4.12416	4.7508	4.42291	4.3209	4.88196	5.52317	5.51588	4.43748	5.11513	5.13699	2.94375	3.20606	4.23346	7.884	4.71437	2.90003	5.78549	5.20985	3.14777	5.10055	7.51967	8.37219	3.59953	5.78549	5.13699	2.94375	3.20606	4.64879	4.69251	4.75809	5.83649	5.85835	5.29	3.62139	6.12066	4.52492	4.21889	5.43573
WAG123 Isorhamnetin - Hexose ,- Hexose (3,7-O) ?	2.74805	1.76367	1.66406	2.14453	1.81445	1.86523	2.07031	1.64258	1.85938	1.42383	1.89062	1.38672	1.18359	0.867188	1.0957	2.74805	1.76367	1.66406	1.37109	2.02734	1.28711	1.19531	1.56445	1.28906	0.949219	1.16016	1.6582	1.30273	1.04297	0.939453	2.74805	1.76367	1.66406	2.00391	2.01758	2.08398	2.55859	2.32812	2.57031	2.27344	2.67969	3.04492	3.07812	3.07227
N449 Isorhamnetin - Hexose - Hexose (3-O) ?	1.03711	0.691406	0.582031	0.814453	0.642578	0.683594	0.728516	0.699219	0.666016	0.652344	0.705078	0.619141	0.605469	0.416016	0.474609	1.03711	0.691406	0.582031	0.685547	0.945312	0.544922	0.482422	0.705078	0.595703	0.548828	0.574219	0.701172	0.767578	0.408203	0.476562	1.03711	0.691406	0.582031	0.814453	0.767578	0.916016	0.962891	0.820312	1.20703	0.859375	1.03906	1.30469	1.17188	1.05273
wag33-n555 kaempferol-3-o-glucoside	23.8427	22.4786	18.0816	23.7992	15.5275	21.4628	12.3494	9.86794	12.7848	7.72021	8.47482	7.16877	7.16877	7.12524	10.0131	23.8427	22.4786	18.0816	22.2899	23.3203	20.3454	20.2293	25.5406	22.1593	14.9761	15.2228	25.1197	10.1582	7.00914	8.18459	23.8427	22.4786	18.0816	20.7517	16.2966	15.8613	26.1791	17.5591	12.5091	10.8692	13.3943	9.33101	9.14236	7.93789
WAG54 Kaempferol-Hexose-Hexose (3-O) ?	40.0286	28.185	26.8602	31.247	27.836	30.9376	25.8924	24.2662	28.0501	22.4893	26.9237	21.9737	21.7674	14.0727	17.2537	40.0286	28.185	26.8602	24.4566	35.0547	20.2205	17.5075	23.7347	20.6092	16.8729	20.5299	26.5905	24.3693	15.7782	15.7465	40.0286	28.185	26.8602	31.2074	32.4131	31.7151	43.0113	34.8564	39.1798	36.5382	41.2978	42.1149	45.5021	50.0555
wag83-n442 kaempferol 3-o-rutinoside	15.6173	16.6761	12.6999	30.5961	20.3837	25.0901	27.4132	21.2087	28.8577	19.6157	19.5177	17.7571	23.2663	14.7765	24.2019	15.6173	16.6761	12.6999	26.6199	28.8577	22.356	34.9991	41.1625	36.7722	29.0948	35.0781	57.5763	39.0101	24.3536	29.4551	15.6173	16.6761	12.6999	23.8384	24.6413	28.0707	28.3868	28.7534	26.386	21.2845	28.8988	23.2663	22.6816	15.6647
WAG101-N214 Kaempferol 3-O-rutinoside-7-O-glucoside	0.539952	0.448509	0	0.99717	0.740257	0.849118	0.971043	0.796865	0.953625	0.822992	0.762029	0.740257	1.01023	0.849118	0.953625	0.539952	0.448509	0	0.931853	0.914435	0.740257	1.1757	1.21925	1.08426	1.08426	1.25408	2.27738	1.74614	1.18006	1.71565	0.539952	0.448509	0	0.735902	0.875245	1.06249	0.936207	1.1278	0.735902	0.696712	1.02765	0.600914	0.735902	0.47899
WAG102 Kaempferol - Hex-Hex-Hex	4.06103	2.56696	2.8769	4.22793	3.81467	4.11667	3.82262	3.85441	3.92593	3.8703	3.95772	4.14051	4.28356	3.36963	4.06898	4.06103	2.56696	2.8769	3.81467	5.14981	3.47294	2.32059	4.21203	3.93388	2.39212	3.52062	5.28491	4.89549	3.10737	3.83851	4.06103	2.56696	2.8769	3.81467	4.03719	4.06898	5.69816	4.89549	3.82262	3.64778	4.81602	3.37757	3.91004	4.76039
	control					light					dark
means	5	6	7	8	9	5	6	7	8	9	5	6	7	8	9	mean control
wag34-n419 quercetin 3-o-glucoside	11.9038	15.7058	12.2225	9.44083	10.0915	11.9038	15.9019	19.2381	18.827	12.3791	11.9038	15.9632	17.9689	15.2739	12.0019	11.8729
WAG89-N362 Quercetin 3-O-rutinoside	25.536	55.3416	63.1001	50.9885	57.4953	25.536	54.3113	75.97	81.5677	78.6146	25.536	51.6726	59.1013	58.8564	47.1464	50.4923
WAG40 Que-hex-hex (3-O)	27.5818	22.8103	21.1442	20.3259	15.7265	27.5818	23.7185	18.7578	19.1123	18.114	27.5818	25.5744	31.1704	32.8729	42.147	21.5177
wag95-n284 quercetin-hexose-deoxyhexose, -pentose	1.28021	1.65169	1.88935	1.62972	2.03715	1.28021	1.93529	2.32475	3.10365	3.2175	1.28021	1.59377	1.88935	1.82145	1.54384	1.69762
wag60-n171 quercetin 3-o-rutinoside-7-o-glucoside	0.641626	0.958835	0.948021	1.0105	1.27725	0.641626	1.0874	1.18953	1.64131	1.70259	0.641626	0.816452	1.09221	0.850696	0.8543	0.967246
WAG135 Quercetin - Hex-Hex-Hex	3.76227	4.63422	4.43262	4.90868	5.02283	3.76227	5.61061	4.63179	5.256	5.91907	3.76227	4.67065	5.48431	5.01069	4.72651	4.55212
WAG123 Isorhamnetin - Hexose ,- Hexose (3,7-O) ?	2.05859	1.94141	1.85742	1.56706	1.04883	2.05859	1.56185	1.34961	1.25586	1.09505	2.05859	2.01074	2.32357	2.50781	3.0651	1.69466
N449 Isorhamnetin - Hexose - Hexose (3-O) ?	0.770182	0.713542	0.697917	0.658854	0.498698	0.770182	0.72526	0.594401	0.608073	0.550781	0.770182	0.791016	0.89974	1.03516	1.17643	0.667839
wag33-n555 kaempferol-3-o-glucoside	21.4676	20.2631	11.6674	7.78794	8.10236	21.4676	21.9852	22.6431	18.4395	8.45064	21.4676	18.5242	19.8665	12.2575	8.80375	13.8577
WAG54 Kaempferol-Hexose-Hexose (3-O) ?	31.6913	30.0069	26.0696	23.7955	17.6979	31.6913	26.5773	20.6172	21.3311	18.6313	31.6913	31.8102	36.5276	39.0052	45.8908	25.8522
wag83-n442 kaempferol 3-o-rutinoside	14.9978	25.3566	25.8265	18.9635	20.7483	14.9978	25.9445	37.6446	40.5831	30.9396	14.9978	24.2398	28.4036	25.5231	20.5375	21.1785
WAG101-N214 Kaempferol 3-O-rutinoside-7-O-glucoside	0.329487	0.862182	0.907178	0.775093	0.937659	0.329487	0.862182	1.15974	1.53857	1.54728	0.329487	0.805574	1.04217	0.820089	0.605269	0.762319
WAG102 Kaempferol - Hex-Hex-Hex	3.1683	4.05309	3.86765	3.98951	3.90739	3.1683	4.14581	3.48883	3.73255	3.94712	3.1683	3.92593	4.88755	4.09547	4.016	3.79719
complete total	145.189	184.299	174.63	145.842	144.592	145.189	184.367	209.609	216.997	185.109	145.189	182.399	210.657	199.931	192.515
control	x1	x2	x3	x4	x5	x6	x7
5	11.9038	25.536	27.5818	1.28021	0.641626	3.76227	2.05859
6	15.7058	55.3416	22.8103	1.65169	0.958835	4.63422	1.94141
7	12.2225	63.1001	21.1442	1.88935	0.948021	4.43262	1.85742
8	9.44083	50.9885	20.3259	1.62972	1.0105	4.90868	1.56706
9	10.0915	57.4953	15.7265	2.03715	1.27725	5.02283	1.04883
light	x1	x2	x3	x4	x5	x6	x7
5	11.9038	25.536	27.5818	1.28021	0.641626	3.76227	2.05859
6	15.9019	54.3113	23.7185	1.93529	1.0874	5.61061	1.56185
7	19.2381	75.97	18.7578	2.32475	1.18953	4.63179	1.34961
8	18.827	81.5677	19.1123	3.10365	1.64131	5.256	1.25586
9	12.3791	78.6146	18.114	3.2175	1.70259	5.91907	1.09505
dark	x1	x2	x3	x4	x5	x6	x7
5	11.9038	25.536	27.5818	1.28021	0.641626	3.76227	2.05859
6	15.9632	51.6726	25.5744	1.59377	0.816452	4.67065	2.01074
7	17.9689	59.1013	31.1704	1.88935	1.09221	5.48431	2.32357
8	15.2739	58.8564	32.8729	1.82145	0.850696	5.01069	2.50781
9	12.0019	47.1464	42.147	1.54384	0.8543	4.72651	3.0651
